# Supplementary material for: The changing information environment for nanotechnology: online audiences and content
Source: Springer Nature journal article supplement (doi:10.1007/s11051-010-9860-2), 2010-02-06
Supplement: MOESM1 [file 5644842]

## Online Appendix

**Table 1** Categories of search of the online environment of nanotechnology

| <b>Domains:</b>          | <b>Subcategories:</b>                    |
|--------------------------|------------------------------------------|
| <b>Environment</b>       | Pollution, Cleanup, Green, Contamination |
| <b>Health</b>            | Medicine, Enhancement, Cancer, Toxin     |
| <b>National Security</b> | Terrorism, Military, Surveillance        |
| <b>Economy</b>           | Job Market, Funding                      |
| <b>Regulation</b>        |                                          |
| <b>Ethics</b>            |                                          |
| <b>Energy</b>            |                                          |
| <b>Privacy</b>           |                                          |
| <b>Risks</b>             |                                          |
| <b>Benefits</b>          |                                          |

| <b>Table 2</b> Description of the themes coded in the content analysis |                                                                         |
|------------------------------------------------------------------------|-------------------------------------------------------------------------|
| <b>THEMES:</b>                                                         | <b>ROOT WORDS:</b>                                                      |
| <b>Application:</b>                                                    |                                                                         |
| National Security                                                      | security, military, surveillance, war*, defense, terrorism*             |
| Health                                                                 | health, medicine*, brain, cancer*, toxin*, asbestos                     |
| Environment                                                            | environment*, pollution*, pesticide*, silver, goo, cleanup              |
| <b>Policy:</b>                                                         |                                                                         |
| Business                                                               | business*, economy*, market*, industry*, product*, consumer*            |
| Research                                                               | research*, findings, analysis*, study*, journal, published              |
| Regulations                                                            | regulate*, guideline*, oversight*, policy*, standard*, law*             |
| Technology                                                             | technology*, robot*, energy, computer*, genetic*, biotechnology*        |
| <b>Social Implications:</b>                                            |                                                                         |
| Risks                                                                  | risk*, hazard*, danger*, threat*, harm*, exposure*                      |
| Benefits                                                               | benefit*, breakthrough*, promise*, advantage*, revolution*, innovation* |
| Uncertainty                                                            | uncertain*, unclear, unknown, inconclusive, unintended, controversy*    |

\* Denotes that multiple forms of the root word were coded. For example, data was collected for “hazard,” hazards,” and “hazardous,” then summed to represent the data for the word “hazard\*.”

**Fig 1** Science Media Use and Age

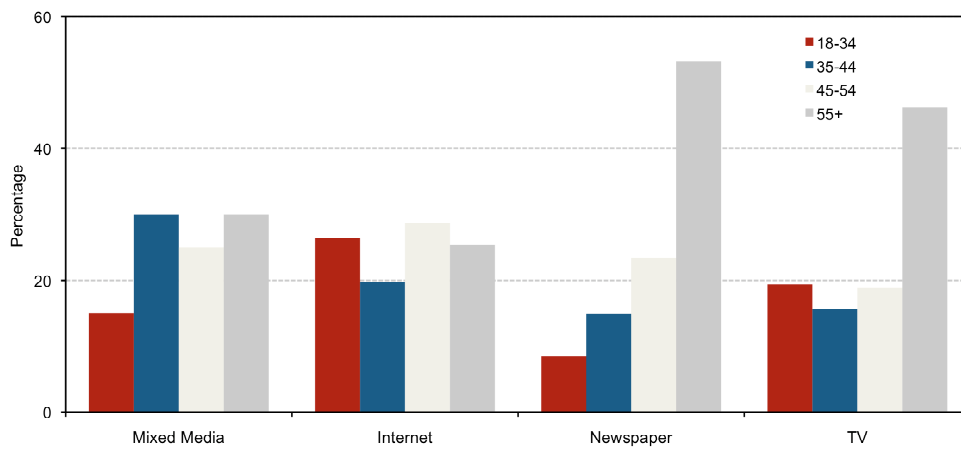

**Fig 2** Science Media Use and Gender

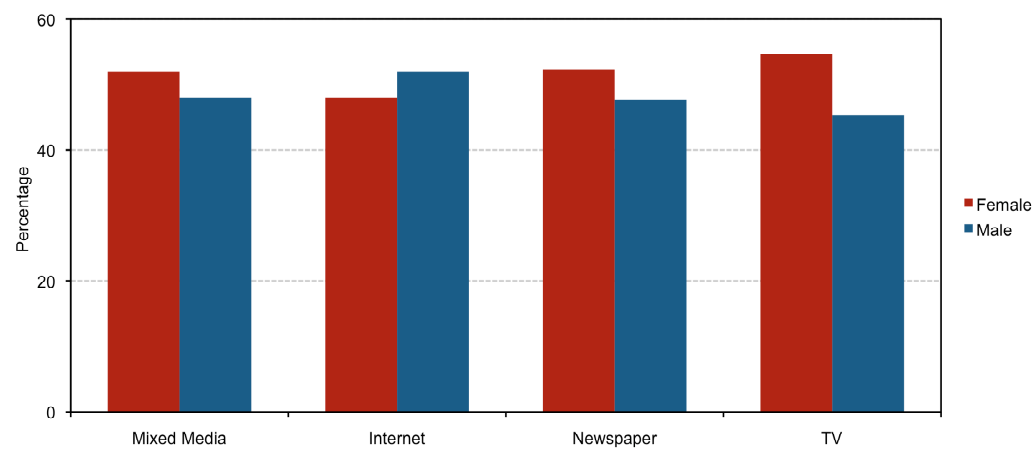

**Fig 3** Science Media Use and Education

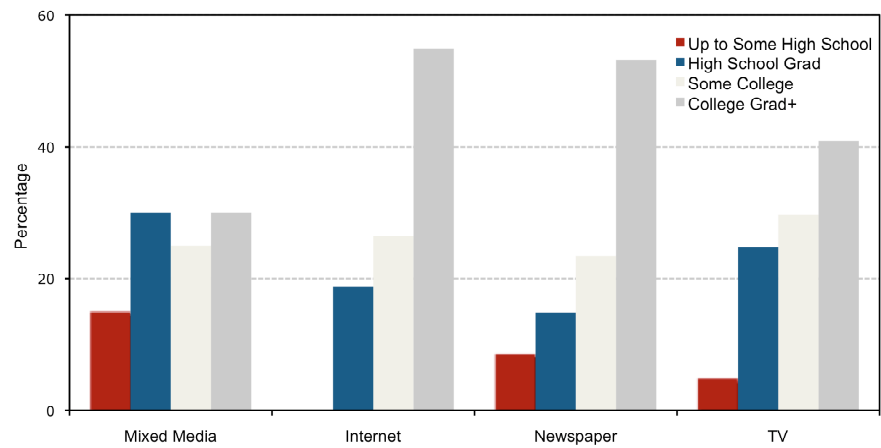

**Fig 4** Science Media Use and Race

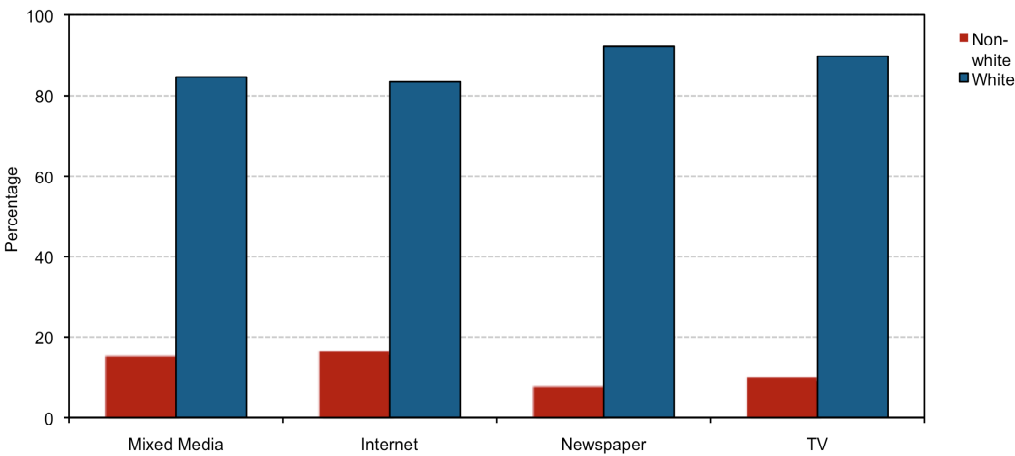

**Fig 5 Science Media Use and Science Knowledge**

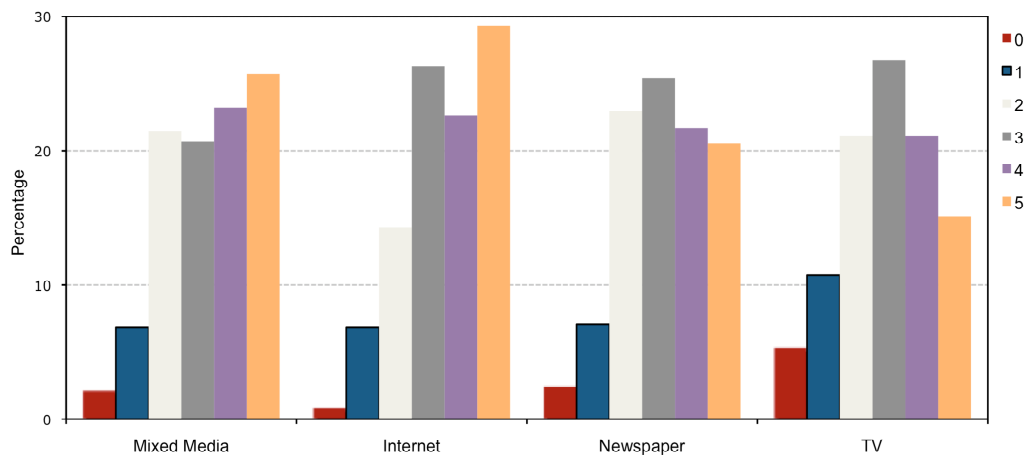

**Science knowledge means for each media category.** Mixed Media = 3.55,  
Internet = 3.48, Newspaper = 3.38, TV = 3.26.  
0=no knowledge at all with zero questions answered correctly. 5=high knowledge  
with all questions answered correctly.

**Fig 6 Science Media Use and Nanotechnology Knowledge**

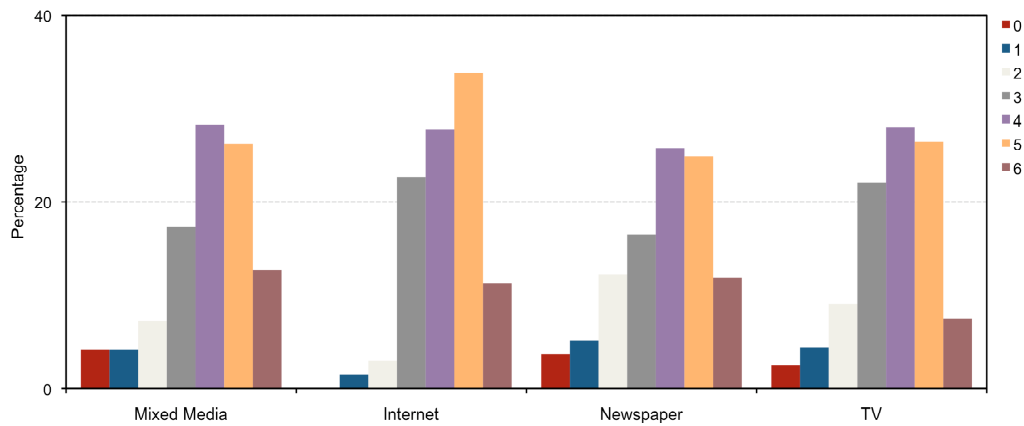

**Nano knowledge means for each media category.** Internet = 4.26, Newspaper = 3.95, TV = 3.94, Mixed Media = 3.70.

0=no knowledge at all with 0 questions answered correctly. 6=high knowledge with all questions answered correctly.

**Table 3** Characteristics of visitors to News and Science Sites during March 2009

|                                                            | News (% of all visitors) | Science (% of all visitors) |
|------------------------------------------------------------|--------------------------|-----------------------------|
| Age                                                        |                          |                             |
| 18-34                                                      | 18.2                     | 18.2                        |
| 35-48                                                      | 36.4                     | 37.0                        |
| 50-64                                                      | 29.8                     | 35.8                        |
| 65+                                                        | 9.3                      | 7.7                         |
| Gender                                                     |                          |                             |
| Female                                                     | 45.6                     | 39.8                        |
| Male                                                       | 54.4                     | 60.2                        |
| Education                                                  |                          |                             |
| Up to some high school                                     | 8.6                      | 13.4                        |
| High school graduate                                       | 13.8                     | 11.2                        |
| Some college                                               | 19.4                     | 20.0                        |
| College grad (includes Associate's and Bachelor's degrees) | 37.1                     | 39.5                        |
| Post-grad degree                                           | 20.8                     | 18.6                        |
| No response                                                | 3.8                      | 2.8                         |
| Race                                                       |                          |                             |
| Non-white                                                  | 11.0                     | 7.3                         |
| White                                                      | 89.0                     | 76.8                        |
| Region                                                     |                          |                             |
| Midwest                                                    | 22.7                     | 19.9                        |
| Northeast                                                  | 20.4                     | 17.9                        |
| South                                                      | 33.0                     | 31.9                        |
| West                                                       | 23.8                     | 32.7                        |

Source: The Nielsen Company
